# Supplementary material for: Patient flow within UK emergency departments: a systematic review of the use of computer simulation modelling methods
Source: PubMed Central journal article supplement (PMC5566625; doi:10.1136/bmjopen-2016-015007), 2017-05-09
Supplement: bmjopen-2016-015007supp001.pdf [file bmjopen-2016-015007supp001.pdf]

## APPENDIX 1

### MEDLINE search strategy

---

- 1 exp Computer Simulation/ (175146)
- 2 models, statistical/ (75054)
- 3 ((computer\* or distributed or hybrid) adj6 (model\* or simulation\*)).mp. (184347)
- 4 ((flow or simulation) adj6 model\$).mp. (41697)
- 5 (system adj3 model\$).mp. (50666)
- 6 (discrete adj2 event).mp. (783)
- 7 (monte adj2 carlo).mp. (40800)
- 8 markov.mp. (17983)
- 9 (statechart\$ or stochastic or system dynamics).mp. (32076)
- 10 (agent adj2 based).mp. (3106)
- 11 or/1-10 (391259)
- 12 workflows/ or crowding/ or exp waiting lists/ (13340)
- 13 time to treatment/ or triage/ or patient admission/ or length of stay/ (92230)
- 14 exp critical pathways/ or exp "Process Assessment (Health care)"/ (8528)
- 15 exp patient care planning/ or exp patient care/ or exp "continuity of patient care"/ (679418)
- 16 ((clinical or critical or patient\*) adj2 (path or paths or pathways)).tw. (5722)
- 17 (patient\$ adj3 (flow or flows or flowing or throughput)).tw. (11371)
- 18 (care adj3 (step or steps or stage\$)).tw. (2424)
- 19 (process adj2 care).tw. (4165)
- 20 (workflow\* or crowding\* or waiting list\* or waiting time\*).tw. (31590)
- 21 or/12-20 (741748)
- 22 emergency medical services/ or emergency medical service communication systems/ or emergency service, hospital/ or exp ambulances/ (86523)
- 23 ((emergency or emergencies or unplanned or unscheduled) adj3 (care or admission\$ or department\$ or ward or wards or service\$ or unit or units or room or rooms)).tw. (95179)
- 24 (A&E or "accident and emergency").tw. (18002)
- 25 (minor injur\* adj2 (unit\* or servic\* or ward\* or hospital\* or department\*)).ti,ab. (137)
- 26 22 or 23 or 24 or 25 (154509)
- 27 11 and 21 and 26 (437)
